# Supplementary material for: Poly(2,3-disulfide-1,4-benzoquinone) as a high-performance cathode for rechargeable aqueous zinc-ion batteries
Source: Royal Society of Chemistry journal article supplement (doi:10.1039/d3nj01701j), 2023-01-01
Supplement: d3nj01701j1.pdf [file d3nj01701j1.pdf]

## **Poly(2,3-disulfide-1,4-benzoquinone) as a high-performance cathode for rechargeable aqueous zinc-ion batteries**

*Chuanzheng Zhu<sup>a</sup>, Jin Chen<sup>c</sup>, Bingjie Zhao<sup>a</sup>, Xin Jiao<sup>a</sup>, Zhiqiang Luo<sup>a\*</sup> and Kaixiang Lei<sup>b\*</sup>*

<sup>a</sup>. Tianjin Key Laboratory for Photoelectric Materials & Devices, School of Materials Science and Engineering, Tianjin Key Laboratory for Advanced Mechatronic System Design and Intelligent Control, School of Mechanical Engineering, Tianjin University of Technology, Tianjin, 300384, China.

<sup>b</sup>. State Key Laboratory of Reliability and Intelligence of Electrical Equipment, School of Materials Science and Engineering, Hebei University of Technology, Tianjin 300401, China.

<sup>c</sup>. Southwest Institute of Technology and Engineering, Chongqing, 400039, China.

\* Corresponding authors (E-mail: zhqluo@email.tjut.edu.cn; kaixianglei@hebut.edu.cn)

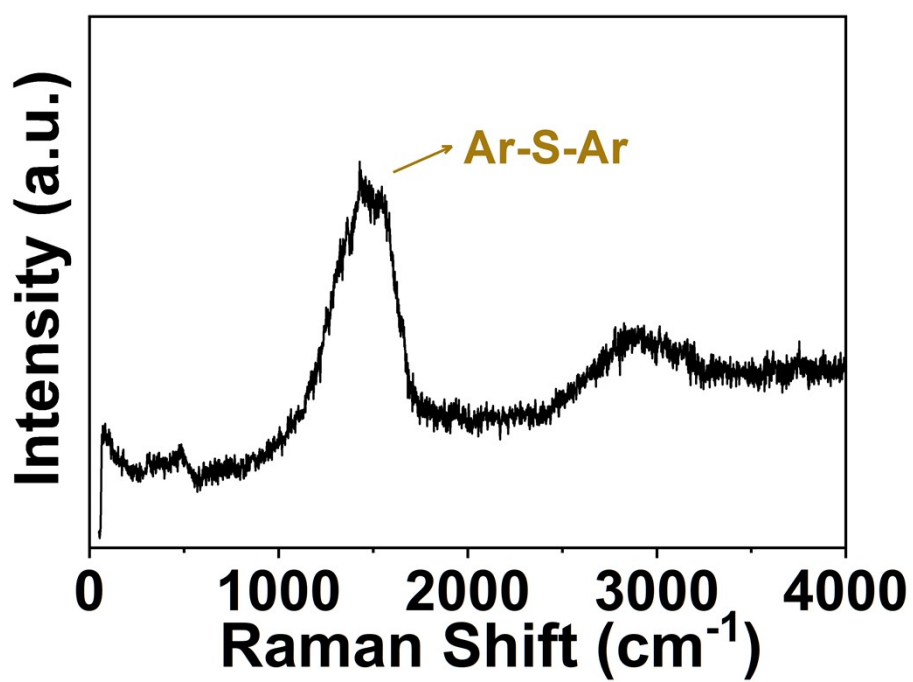

**Figure S1.** The Raman spectra of PSBQ.

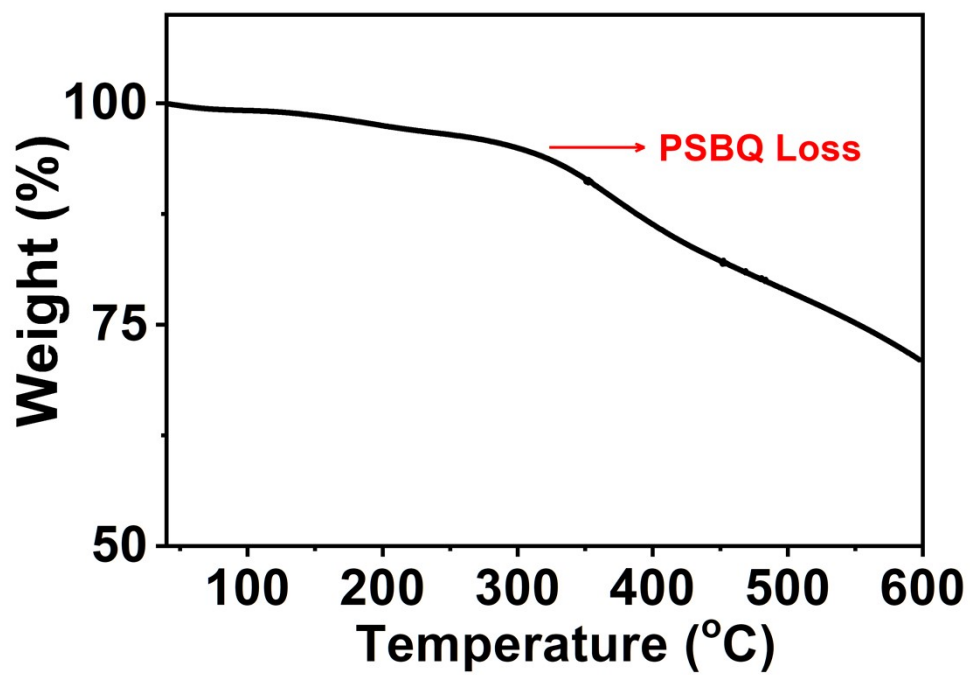

Figure S2. Thermal stability of PSBQ.

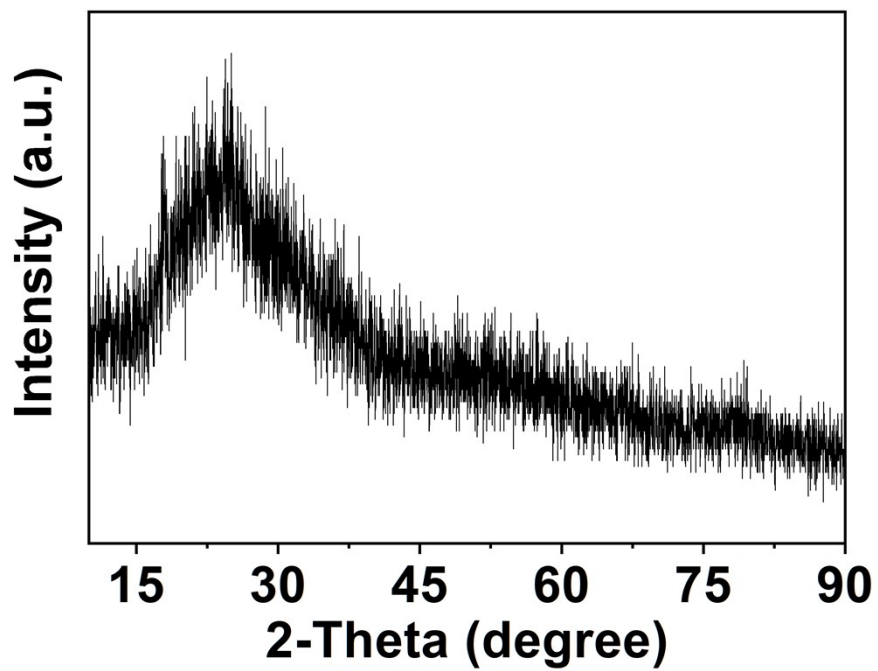

**Figure S3.** XRD spectra of PSBQ.

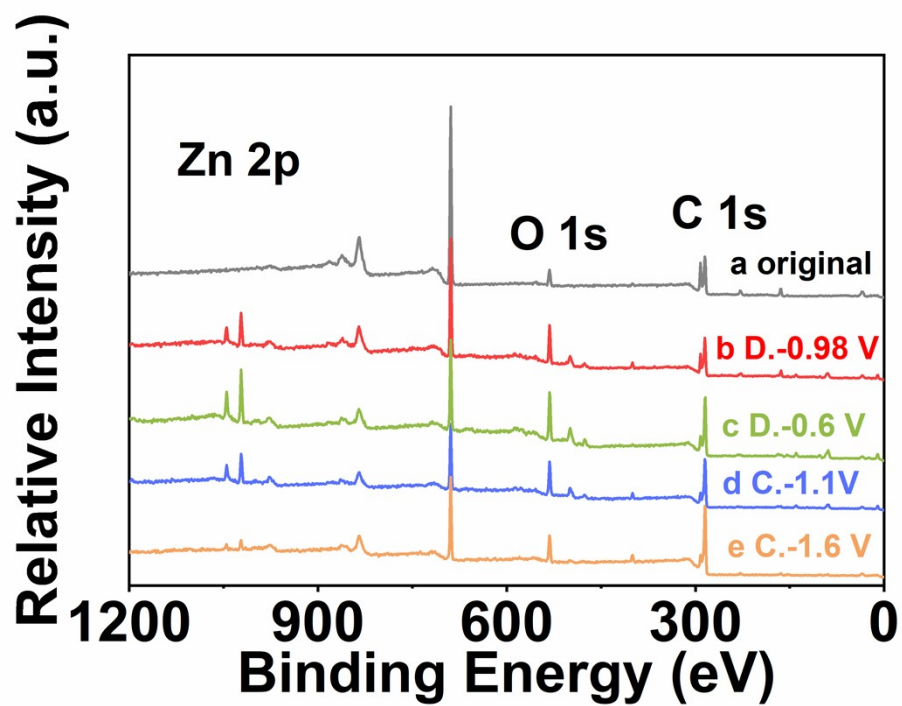

Figure S4. XPS spectra of PSBQ electrode in various states.

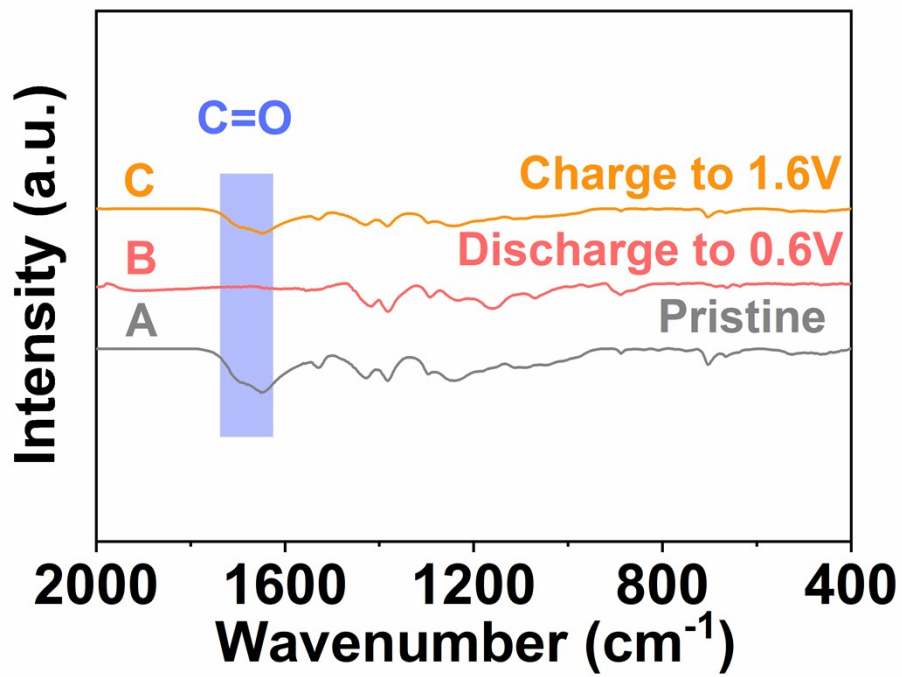

**Figure S5.** Ex situ IR spectra of PSBQ electrode in charge and discharge states.

**Charge to 1.6V**

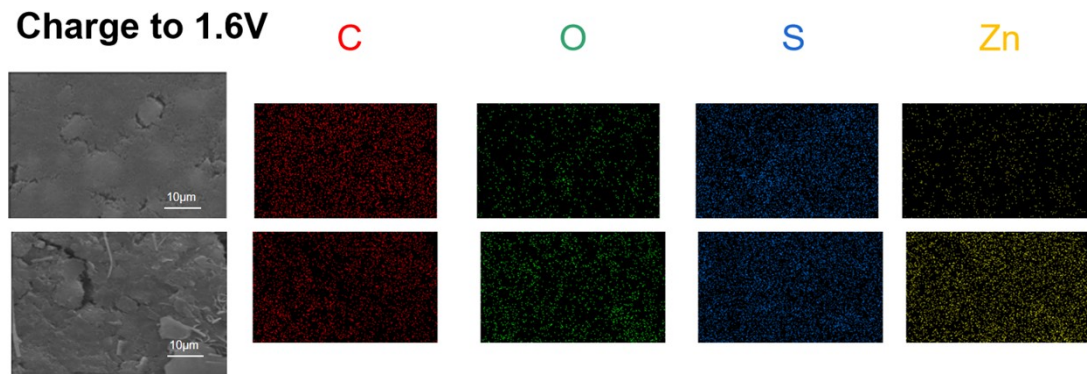

**Discharge to 0.6V**

**Figure S6.** SEM-mapping of PSBQ electrode in charge and discharge states.

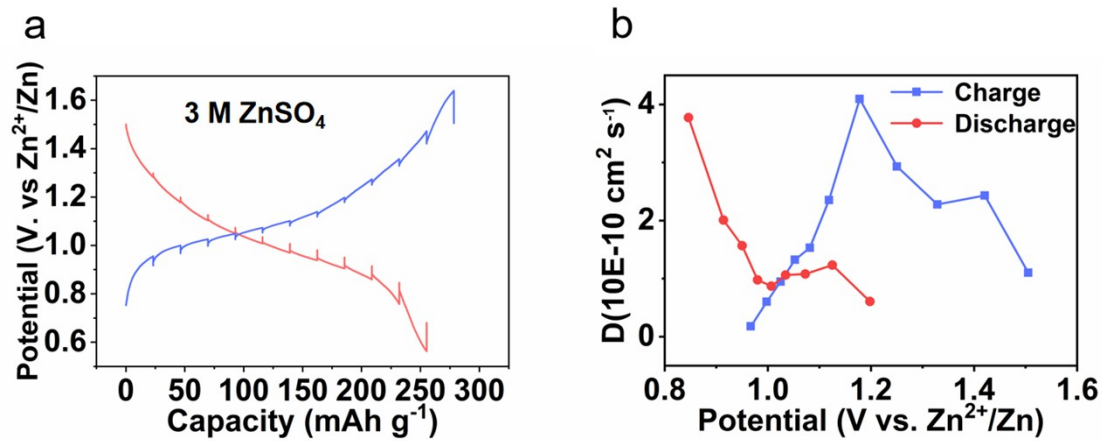

**Figure S7.** (a) GITT curve for Zn || PSBQ battery with 3 M  $ZnSO_4$  Aqueous electrolyte. (b) Diffusion coefficient.



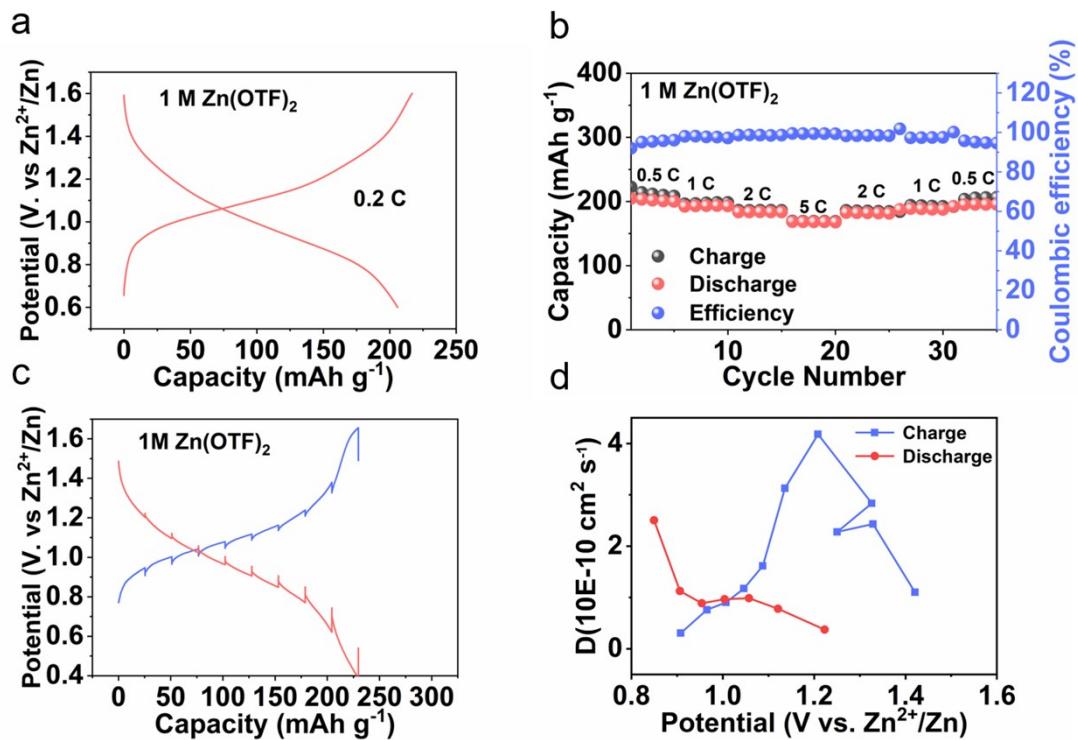

**Figure S8.** (a) Typical discharge/charge curves at a current density of 0.2C with electrolyte of 1M Zn(OTF)<sub>2</sub> in DMF. (b) Rate capability. (c) GITT curve for Zn||PSBQ battery with electrolyte of 1M Zn(OTF)<sub>2</sub> in DMF. (d) Diffusion coefficient.

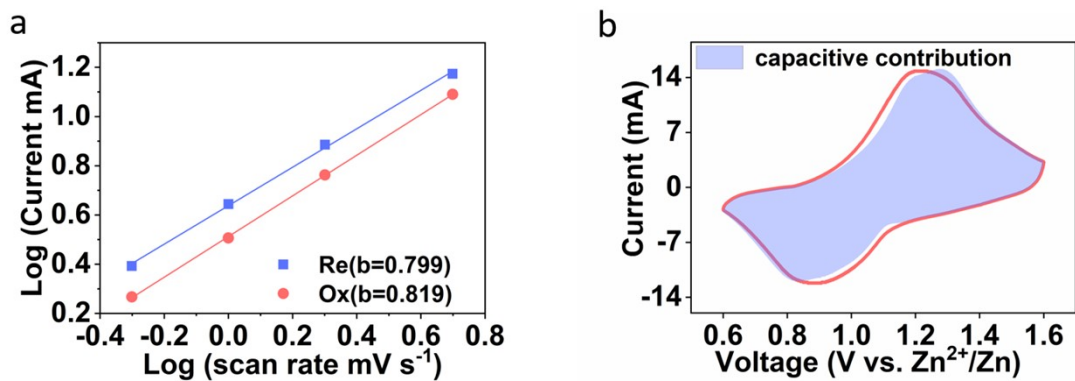

**Figure S9.** (a) Logarithmic relationship of peak current and scan rate. (b) CV curve at  $0.5 \text{ mV s}^{-1}$  with capacitive currents ( $kIv$ ) outlined in the blue area.

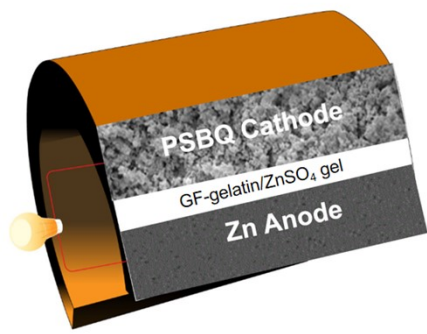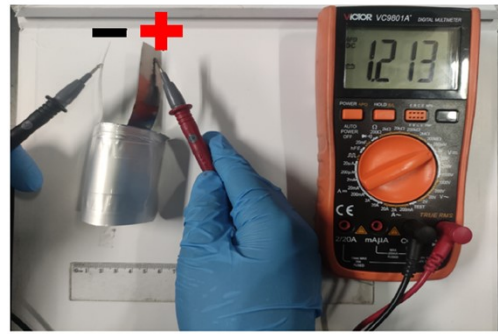

**Figure S10.** The image of open-circuit voltage of Flexible Zn||PSBQ battery.

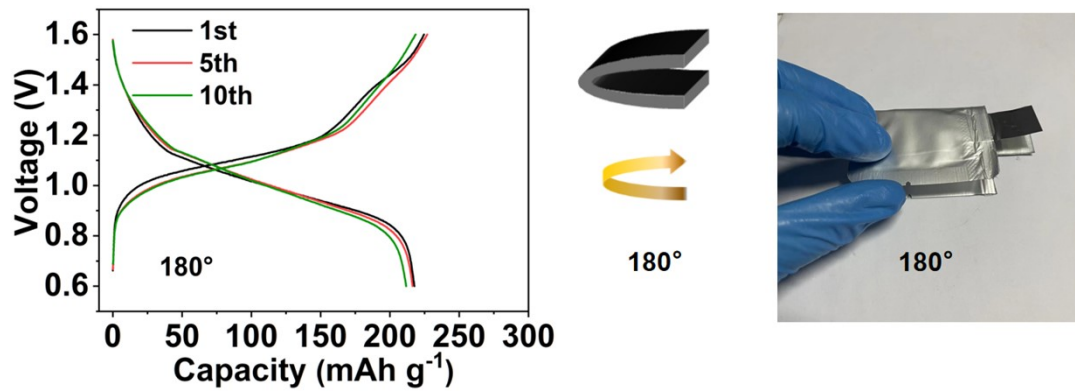

**Figure S11.** Zn || PSBQ flexible battery selected discharge/charge curve at 180° .

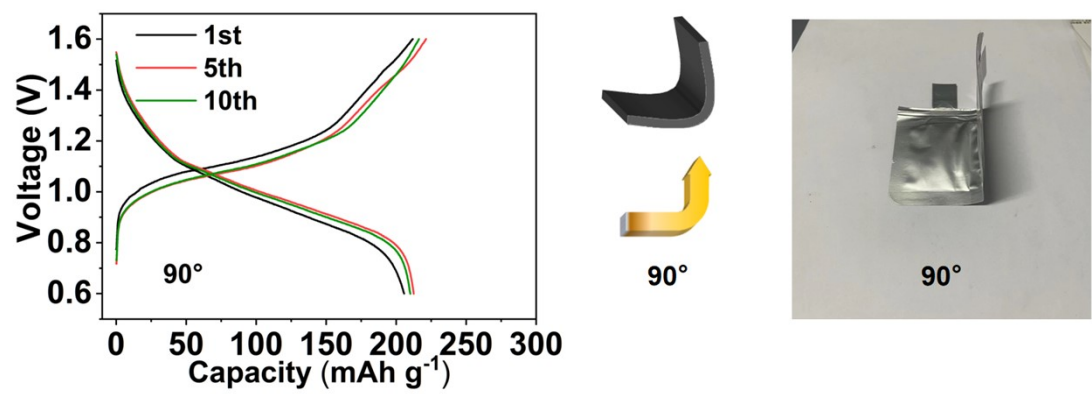

**Figure S12.** Zn || PSBQ flexible battery selected discharge/charge curve at 90° .

**Table S1.** Comparison of the electrochemical performance of Zn-PSBQ battery with reported aqueous Zn-polymer batteries at a current density of about 1 A g<sup>-1</sup>.

| Cathode Materials        | Electrolyte                                           | Discharge capacity (mAh g <sup>-1</sup> ) <sup>a)</sup> | Voltage range (V) | Working Voltage (V) | Energy Density (Wh kg <sup>-1</sup> ) <sup>a)</sup> |
|--------------------------|-------------------------------------------------------|---------------------------------------------------------|-------------------|---------------------|-----------------------------------------------------|
| OAP <sup>[1]</sup>       | 3 M Zn(CF <sub>3</sub> SO <sub>3</sub> ) <sub>2</sub> | 105.1                                                   | 0.2-1.2           | 0.65                | 68.3                                                |
| PCSA <sup>[2]</sup>      | 3 M Zn(CF <sub>3</sub> SO <sub>3</sub> ) <sub>2</sub> | 40                                                      | 0.2-1.6           | 0.875               | 35                                                  |
| PQTU <sup>[3]</sup>      | 1 M ZnSO <sub>4</sub>                                 | 40                                                      | 0.2-1.7           | 1                   | 40                                                  |
| PBQS <sup>[4]</sup>      | 3 M Zn(CF <sub>3</sub> SO <sub>3</sub> ) <sub>2</sub> | 126                                                     | 0.2-1.7           | 1                   | 126                                                 |
| PTMA <sup>[5]</sup>      | 2 M Zn(CF <sub>3</sub> SO <sub>3</sub> ) <sub>2</sub> | 80                                                      | 1-1.8             | 1.5                 | 120                                                 |
| PQN14 <sup>[6]</sup>     | 1 M Zn(CF <sub>3</sub> SO <sub>3</sub> ) <sub>2</sub> | 67                                                      | 0.2-1.6           | 0.7                 | 46.9                                                |
| 2, 6-NAPD <sup>[7]</sup> | 1 M ZnSO <sub>4</sub>                                 | 58                                                      | 0.5-1.5           | 0.8                 | 46.4                                                |
| PDBS <sup>[8]</sup>      | 2 M ZnSO <sub>4</sub>                                 | 230                                                     | 0.4-1.4           | 0.7                 | 161                                                 |
| <b>PSBQ</b>              | <b>3 M ZnSO<sub>4</sub></b>                           | <b>198</b>                                              | <b>0.6-1.6</b>    | <b>1.1</b>          | <b>217</b>                                          |

<sup>a)</sup>The values are calculated based on the mass of stoichiometric cathode.

**Table S2.** Elemental analysis of PSBQ-Zn based on the XPS data.

| Elemental Name | Peak BE | FWHM eV | Area (P)CPS.eV | Atomic % |
|----------------|---------|---------|----------------|----------|
| F1s            | 689.08  | 2.81    | 248805.1       | 21.52    |
| Zn2p3          | 1021.94 | 3.01    | 153952.49      | 3.58     |
| C1s            | 284.41  | 1.76    | 216601.73      | 56.56    |
| O1s            | 531.77  | 3.11    | 148212.25      | 16.01    |
| S2p            | 167.72  | 5.11    | 16520.11       | 2.33     |

## References

- 1 X. Gao, Z. Liu, X. Tuo, S. Chen, S. Cai, M. Yan, Q. Zhang and Z. Liu, A case study on storage and capacity fading mechanism of poly(perylene diimides) cathode in aqueous zinc ion battery. *Electrochim. Acta*, 2023, **453**, 142321.
- 2 C. Guo, Y. Liu, D. Wu, J. Wang, X. Shen, C. Jia, J. Zhang and L. Wang, Auxiliary coordination strategy designed poly(chloranil-squaricamide) cathode achieving enhanced specific capacity utilization and Zn<sup>2+</sup> insertion/extraction for aqueous zinc ion batteries. *J. Electroanal. Chem.*, 2023, **940**, 117511.
- 3 C. Guo, Y. Liu, L. Wang, D. Kong and J. Wang, Poly(quinone-thiourea) with improved auxiliary coordination Zn<sup>2+</sup> insertion/extraction positive performance for aqueous zinc ion battery cathodes. *ACS Sustain. Chem. Eng.*, 2021, **10**, 213-223.
- 4 G. Dawut, Y. Lu, L. Miao and J. Chen, High-performance rechargeable aqueous Zn-ion batteries with a poly(benzoquinonyl sulfide) cathode. *Inorg. Chem. Front*, 2018, **5**, 1391-1396.
- 5 L. Elbinger, E. Schroter, C. Friebe, M. D. Hager and U. S. Schubert, Hydrophilic crosslinked TEMPO-methacrylate copolymers – a straight forward approach towards aqueous semi-organic batteries. *ChemSusChem*, 2022, **15**, e202200830.
- 6 C. Guo, Y. Liu, J. Zhang, W. Zhao, K. Wang, M. Su, Y. Hu and L. Wang, Poly(quinone-1,4-diaminoanthraquinone) cathodes for stable Zn<sup>2+</sup> storage in aqueous zinc-ion batteries. *Ionics*, 2023, **21**, 2319-2328.
- 7 Y. Xie, W. Su, Q. Hu, F. Lai, Z. Yan, G. Huang, S. Lu and X. Zhang, Electropolymerization reaction-driven 2,6naphthalenediamine monomers to a multilayered sheet structure for ultralong cycling aqueous zinc-ion batteries. *New J. Chem*, 2022, **46**, 18244-18250.
- 8 T. Sun, Z. J. Li, Y. F. Zhi, Y. J. Huang, H. J. Fan and Q. Zhang, Poly(2,5-dihydroxy-1,4-benzoquinonyl sulfide) as an efficient cathode for high-performance aqueous zinc-organic batteries. *Adv. Funct. Mater.*, 2021, **31**, 2010049.
